# Supplementary material
Source: PubMed Central journal article supplement (PMC8908811)

## Supplementary Appendix

Supplement to: Andrews N, Stowe J, Kirsebom F, et al. Covid-19 vaccine effectiveness against the omicron (B.1.1.529) variant. N Engl J Med. DOI: 10.1056/NEJMoa2119451

This appendix has been provided by the authors to give readers additional information about the work.

## Table of Contents

|                                                                                                                                |   |
|--------------------------------------------------------------------------------------------------------------------------------|---|
| Supplementary Tables .....                                                                                                     | 1 |
| Supplementary Table 1. Weekly COVID-19 cases by gender, age and region and incidence ethnicity in the general population*..... | 1 |
| Supplementary Table 2. Logistic regression model results for Omicron and for Delta showing all factors included*.....          | 2 |
| Supplementary Figures .....                                                                                                    | 7 |
| Supplementary Figure 1. Flow chart demonstrating test selection and methodology. ....                                          | 7 |
| Supplementary Figure 2. Distribution of Delta and Omicron cases in the study period. ....                                      | 8 |

## Supplementary Tables

**Supplementary Table 1. Weekly COVID-19 cases by gender, age and region and incidence ethnicity in the general population\***

| Category  |                                             | Number of Cases** | %    |
|-----------|---------------------------------------------|-------------------|------|
| Gender    | Male                                        | 16003032          | 39.6 |
|           | Female                                      | 22607593          | 56.0 |
|           | Missing                                     | 1759501           | 4.4  |
| Age       | 10 to 19                                    | 3432688           | 9.7  |
|           | 20 to 29                                    | 5527668           | 15.6 |
|           | 30 to 39                                    | 6604404           | 18.6 |
|           | 40 to 49                                    | 6008448           | 16.9 |
|           | 50 to 59                                    | 5978604           | 16.8 |
|           | 60 to 69                                    | 3754437           | 10.6 |
|           | 70 to 79                                    | 2117846           | 6.0  |
|           | 80+                                         | 1947527           | 5.5  |
|           | Unknown                                     | 124914            | 0.4  |
| Region    | East Midlands                               | 3047258           | 7.5  |
|           | East of England                             | 4954257           | 12.3 |
|           | London                                      | 7391485           | 18.3 |
|           | North East                                  | 1795178           | 4.4  |
|           | North West                                  | 5138366           | 12.7 |
|           | South East                                  | 6908226           | 17.1 |
|           | South West                                  | 4093489           | 10.1 |
|           | West Midlands                               | 3838332           | 9.5  |
|           | Yorkshire and Humber                        | 3203399           | 7.9  |
|           |                                             | Unknown           | 136  |
| Ethnicity | White                                       | 4569980           | 84   |
|           | Indian (Asian or Asian British)             | 167568            | 3    |
|           | Pakistani (Asian or Asian British)          | 94046             | 2    |
|           | Other Asian / Asian British                 | 177846            | 3    |
|           | Black / African / Caribbean / Black British | 215031            | 4    |
|           | Mixed / Multiple ethnic groups              | 157049            | 3    |
|           | Other ethnic group                          | 68339             | 1    |

\*data extracted from National flu and COVID-19 surveillance data report: 13 January 2022 (week 2)  
[<https://www.gov.uk/government/statistics/national-flu-and-covid-19-surveillance-reports-2021-to-2022-season>]

\*\*Pillar 1 and Pillar 2, from week 40 of 2021 to week 1 of 2022

**Supplementary Table 2. Logistic regression model results for Omicron and for Delta showing all factors included\***

| Factor                                         |                     |               |                    | Omicron    |                  |                  | Delta      |                  |                  |      |      |
|------------------------------------------------|---------------------|---------------|--------------------|------------|------------------|------------------|------------|------------------|------------------|------|------|
|                                                |                     |               |                    | Odds Ratio | 95% CI lower end | 95% CI upper end | Odds Ratio | 95% CI lower end | 95% CI upper end |      |      |
| Vaccination Status and intervals after vaccine | Manufacturer        | Dose          | Interval           |            |                  |                  |            |                  |                  |      |      |
|                                                | Unvaccinated        |               |                    | 1.00       | Baseline         |                  | 1.00       | Baseline         |                  |      |      |
|                                                | ChAdOx1-S           | Dose 1        | 0-4 weeks          |            | 0.83             | 0.45             | 1.55       | 0.72             | 0.31             | 1.70 |      |
|                                                |                     |               | 4+ weeks           |            | 0.82             | 0.79             | 0.86       | 0.57             | 0.54             | 0.60 |      |
|                                                |                     | Dose 2        | 0-2 weeks          |            | 0.83             | 0.65             | 1.06       | 0.32             | 0.22             | 0.47 |      |
|                                                |                     |               | 2-5 weeks          |            | 0.51             | 0.43             | 0.61       | 0.17             | 0.12             | 0.25 |      |
|                                                |                     |               | 5-9 weeks          |            | 0.66             | 0.59             | 0.75       | 0.23             | 0.19             | 0.30 |      |
|                                                |                     |               | 10-14 weeks        |            | 0.71             | 0.64             | 0.79       | 0.31             | 0.27             | 0.35 |      |
|                                                |                     |               | 15-19 weeks        |            | 0.82             | 0.78             | 0.87       | 0.46             | 0.45             | 0.48 |      |
|                                                |                     |               | 20-24 weeks        |            | 0.96             | 0.94             | 0.98       | 0.53             | 0.52             | 0.54 |      |
|                                                |                     | 25+ weeks     |                    | 1.03       | 1.01             | 1.04             | 0.57       | 0.55             | 0.58             |      |      |
|                                                |                     | Booster (any) | 0-1 days           |            | 0.86             | 0.83             | 0.88       | 0.52             | 0.50             | 0.54 |      |
|                                                |                     |               | 2-6 days           |            | 0.76             | 0.75             | 0.78       | 0.43             | 0.41             | 0.44 |      |
|                                                |                     | BNT162b2      | Booster (BNT162b2) | 1 week     |                  | 0.41             | 0.40       | 0.42             | 0.11             | 0.11 | 0.12 |
|                                                |                     |               |                    | 2-4 weeks  |                  | 0.38             | 0.37       | 0.38             | 0.05             | 0.04 | 0.05 |
|                                                |                     |               |                    | 5-9 weeks  |                  | 0.47             | 0.46       | 0.48             | 0.07             | 0.07 | 0.08 |
|                                                | 10+ weeks           |               |                    | 0.60       | 0.59             | 0.62             | 0.12       | 0.11             | 0.13             |      |      |
|                                                | Booster (mRNA-1273) |               | 1 week             |            | 0.32             | 0.31             | 0.33       | 0.09             | 0.08             | 0.09 |      |
|                                                |                     |               | 2-4 weeks          |            | 0.30             | 0.29             | 0.30       | 0.03             | 0.03             | 0.03 |      |
|                                                |                     |               | 5-9 weeks          |            | 0.39             | 0.38             | 0.40       | 0.05             | 0.04             | 0.06 |      |
|                                                |                     |               | 10+ weeks          |            | 0.78             | 0.49             | 1.24       | 0.23             | 0.03             | 1.85 |      |
|                                                | Booster (ChAdOx1-S) |               | 1 week             |            | 0.42             | 0.29             | 0.62       | 0.23             | 0.12             | 0.45 |      |
|                                                |                     |               | 2-4 weeks          |            | 0.44             | 0.35             | 0.56       | 0.18             | 0.11             | 0.29 |      |
|                                                |                     | 5-9 weeks     |                    | 0.53       | 0.43             | 0.66             | 0.17       | 0.09             | 0.30             |      |      |
|                                                |                     | 10+ weeks     |                    | 0.50       | 0.32             | 0.77             | n/a*       |                  |                  |      |      |
|                                                | BNT162b2            | Dose 1        | 0-4 weeks          |            | 0.57             | 0.55             | 0.60       | 0.52             | 0.49             | 0.56 |      |
| 4+ weeks                                       |                     |               | 0.68               | 0.67       | 0.70             | 0.55             | 0.53       | 0.57             |                  |      |      |
| Dose 2                                         |                     | 0-2 weeks     |                    | 0.42       | 0.40             | 0.44             | 0.28       | 0.25             | 0.31             |      |      |
|                                                |                     | 2-5 weeks     |                    | 0.35       | 0.33             | 0.36             | 0.09       | 0.08             | 0.10             |      |      |
|                                                |                     | 5-9 weeks     |                    | 0.51       | 0.50             | 0.53             | 0.14       | 0.14             | 0.15             |      |      |
|                                                |                     | 10-14 weeks   |                    | 0.70       | 0.68             | 0.71             | 0.21       | 0.21             | 0.22             |      |      |
|                                                |                     | 15-19 weeks   |                    | 0.85       | 0.83             | 0.86             | 0.26       | 0.25             | 0.26             |      |      |
|                                                |                     | 20-24 weeks   |                    | 0.88       | 0.87             | 0.90             | 0.33       | 0.32             | 0.33             |      |      |
| 25+ weeks                                      |                     | 0.91          | 0.89               | 0.93       | 0.37             | 0.36             | 0.38       |                  |                  |      |      |
| Booster (any)                                  |                     | 0-1 days      |                    | 0.71       | 0.69             | 0.73             | 0.26       | 0.24             | 0.28             |      |      |
|                                                |                     | 2-6 days      |                    | 0.59       | 0.57             | 0.60             | 0.23       | 0.22             | 0.24             |      |      |
| Booster (BNT162b2)                             |                     | 1 week        |                    | 0.33       | 0.32             | 0.34             | 0.08       | 0.07             | 0.08             |      |      |
|                                                |                     | 2-4 weeks     |                    | 0.33       | 0.32             | 0.33             | 0.05       | 0.05             | 0.05             |      |      |
|                                                |                     | 5-9 weeks     |                    | 0.45       | 0.44             | 0.46             | 0.08       | 0.08             | 0.09             |      |      |

|                  |                          |             |      |          |      |      |          |      |
|------------------|--------------------------|-------------|------|----------|------|------|----------|------|
|                  |                          | 10+ weeks   | 0.54 | 0.53     | 0.55 | 0.10 | 0.10     | 0.11 |
|                  | Booster<br>(mRNA-1273)   | 1 week      | 0.26 | 0.25     | 0.27 | 0.06 | 0.05     | 0.07 |
|                  |                          | 2-4 weeks   | 0.26 | 0.25     | 0.27 | 0.03 | 0.03     | 0.04 |
|                  |                          | 5-9 weeks   | 0.36 | 0.34     | 0.37 | 0.05 | 0.04     | 0.07 |
|                  |                          | 10+ weeks   | 0.45 | 0.29     | 0.70 | 0.10 | 0.01     | 0.75 |
|                  | Dose 1                   | 0-4 weeks   | 0.52 | 0.48     | 0.57 | 0.40 | 0.33     | 0.48 |
|                  |                          | 4+ weeks    | 0.68 | 0.64     | 0.73 | 0.43 | 0.38     | 0.47 |
|                  | Dose 2                   | 0-2 weeks   | 0.39 | 0.32     | 0.47 | 0.25 | 0.18     | 0.36 |
|                  |                          | 2-5 weeks   | 0.25 | 0.21     | 0.29 | 0.05 | 0.03     | 0.09 |
|                  |                          | 5-9 weeks   | 0.47 | 0.43     | 0.52 | 0.08 | 0.06     | 0.10 |
|                  |                          | 10-14 weeks | 0.64 | 0.62     | 0.67 | 0.16 | 0.15     | 0.17 |
|                  |                          | 15-19 weeks | 0.75 | 0.73     | 0.77 | 0.17 | 0.16     | 0.18 |
|                  |                          | 20-24 weeks | 0.85 | 0.82     | 0.88 | 0.24 | 0.22     | 0.25 |
|                  | Booster (any)            | 25+ weeks   | 0.85 | 0.75     | 0.96 | 0.20 | 0.12     | 0.33 |
|                  |                          | 0-1 days    | 0.69 | 0.64     | 0.75 | 0.18 | 0.14     | 0.22 |
|                  |                          | 2-6 days    | 0.56 | 0.53     | 0.59 | 0.16 | 0.13     | 0.19 |
|                  | Booster<br>(BNT162b2)    | 1 week      | 0.36 | 0.33     | 0.38 | 0.04 | 0.03     | 0.07 |
|                  |                          | 2-4 weeks   | 0.35 | 0.33     | 0.38 | 0.05 | 0.03     | 0.11 |
|                  |                          | 5-9 weeks   | 0.50 | 0.25     | 0.99 | n/a* |          |      |
|                  |                          | 10+ weeks   | n/a* |          |      | n/a* |          |      |
|                  | Booster<br>(mRNA-1273)   | 1 week      | 0.32 | 0.30     | 0.34 | 0.05 | 0.03     | 0.08 |
|                  |                          | 2-4 weeks   | 0.34 | 0.31     | 0.36 | 0.04 | 0.01     | 0.09 |
|                  |                          | 5-9 weeks   | 0.95 | 0.27     | 3.42 | n/a* |          |      |
| <b>Gender</b>    | Female                   |             | 1.00 | Baseline |      | 1.00 | Baseline |      |
|                  | Male                     |             | 1.22 | 1.22     | 1.23 | 1.20 | 1.19     | 1.21 |
| <b>Age</b>       | 18-19                    |             | 1.00 | Baseline |      | 1.00 | Baseline |      |
|                  | 20-24                    |             | 0.96 | 0.95     | 0.98 | 1.07 | 1.03     | 1.11 |
|                  | 25-29                    |             | 0.84 | 0.83     | 0.86 | 1.16 | 1.11     | 1.20 |
|                  | 30-34                    |             | 0.74 | 0.73     | 0.76 | 1.31 | 1.26     | 1.36 |
|                  | 35-39                    |             | 0.73 | 0.71     | 0.74 | 1.58 | 1.52     | 1.64 |
|                  | 40-44                    |             | 0.78 | 0.77     | 0.80 | 1.79 | 1.72     | 1.86 |
|                  | 45-49                    |             | 0.84 | 0.82     | 0.85 | 1.87 | 1.80     | 1.95 |
|                  | 50-54                    |             | 0.85 | 0.83     | 0.86 | 1.83 | 1.76     | 1.90 |
|                  | 55-59                    |             | 0.81 | 0.80     | 0.83 | 1.78 | 1.71     | 1.86 |
|                  | 60-64                    |             | 0.75 | 0.74     | 0.77 | 1.72 | 1.64     | 1.80 |
|                  | 65-69                    |             | 0.68 | 0.65     | 0.72 | 1.49 | 1.33     | 1.67 |
|                  | 70-74                    |             | 0.68 | 0.64     | 0.72 | 1.54 | 1.35     | 1.76 |
|                  | 75-79                    |             | 0.71 | 0.66     | 0.75 | 1.60 | 1.39     | 1.84 |
|                  | 80-84                    |             | 0.65 | 0.61     | 0.70 | 1.55 | 1.32     | 1.81 |
|                  | 85-89                    |             | 0.59 | 0.54     | 0.64 | 1.70 | 1.43     | 2.03 |
| >=90             |                          | 0.56        | 0.50 | 0.62     | 1.51 | 1.20 | 1.90     |      |
| <b>Ethnicity</b> | African                  |             | 1.66 | 1.62     | 1.70 | 0.66 | 0.63     | 0.69 |
|                  | Another Asian background |             | 1.08 | 1.05     | 1.11 | 0.90 | 0.86     | 0.95 |
|                  | Another Black background |             | 1.43 | 1.33     | 1.54 | 0.68 | 0.59     | 0.79 |

|                            |                                 |       |          |       |      |          |      |
|----------------------------|---------------------------------|-------|----------|-------|------|----------|------|
|                            | Another ethnic background       | 0.99  | 0.95     | 1.02  | 0.80 | 0.75     | 0.85 |
|                            | Arab                            | 0.77  | 0.73     | 0.81  | 0.82 | 0.75     | 0.90 |
|                            | Bangladeshi                     | 0.82  | 0.79     | 0.84  | 0.95 | 0.89     | 1.01 |
|                            | Caribbean                       | 1.83  | 1.77     | 1.89  | 0.89 | 0.84     | 0.95 |
|                            | Chinese                         | 0.78  | 0.75     | 0.80  | 0.65 | 0.61     | 0.70 |
|                            | Indian                          | 0.82  | 0.80     | 0.83  | 0.68 | 0.66     | 0.70 |
|                            | Mixed or multiple ethnic groups | 1.15  | 1.13     | 1.17  | 0.82 | 0.79     | 0.86 |
|                            | Pakistani                       | 0.82  | 0.80     | 0.84  | 0.75 | 0.72     | 0.79 |
|                            | White                           | 1.00  | Baseline |       | 1.00 | Baseline |      |
|                            | Prefer not to say               | 0.87  | 0.85     | 0.88  | 0.80 | 0.77     | 0.82 |
| <b>NHS Region</b>          | East of England                 | 1.00  | Baseline |       | 1.00 | Baseline |      |
|                            | London                          | 1.68  | 1.66     | 1.71  | 0.95 | 0.93     | 0.97 |
|                            | Midlands                        | 1.27  | 1.26     | 1.29  | 1.16 | 1.14     | 1.18 |
|                            | North East                      | 1.56  | 1.54     | 1.58  | 1.41 | 1.38     | 1.44 |
|                            | North West                      | 2.36  | 2.33     | 2.39  | 1.61 | 1.57     | 1.64 |
|                            | South East                      | 1.22  | 1.20     | 1.23  | 1.05 | 1.03     | 1.07 |
|                            | South West                      | 0.90  | 0.89     | 0.91  | 1.07 | 1.05     | 1.09 |
| <b>IMD Quintiles</b>       | 1                               | 1.00  | Baseline |       | 1.00 | Baseline |      |
|                            | 2                               | 1.02  | 1.01     | 1.03  | 1.00 | 0.98     | 1.02 |
|                            | 3                               | 1.01  | 1.00     | 1.02  | 1.00 | 0.98     | 1.01 |
|                            | 4                               | 1.03  | 1.02     | 1.04  | 1.00 | 0.98     | 1.01 |
|                            | 5                               | 1.02  | 1.01     | 1.03  | 0.97 | 0.95     | 0.98 |
| <b>Previously positive</b> | No                              | 1.00  | Baseline |       | 1.00 | Baseline |      |
|                            | Yes                             | 0.50  | 0.49     | 0.50  | 0.09 | 0.09     | 0.10 |
| <b>Health care worker</b>  | No                              | 1.00  | Baseline |       | 1.00 | Baseline |      |
|                            | Yes                             | 0.76  | 0.75     | 0.77  | 0.73 | 0.71     | 0.76 |
| <b>In a risk group</b>     | No                              | 1.00  | Baseline |       | 1.00 | Baseline |      |
|                            | Yes                             | 0.84  | 0.83     | 0.84  | 0.89 | 0.87     | 0.90 |
|                            | Age 65+                         | 0.92  | 0.87     | 0.97  | 1.01 | 0.90     | 1.13 |
| <b>CEV</b>                 | No                              | 1.00  | Baseline |       | 1.00 | Baseline |      |
|                            | Yes                             | 0.89  | 0.88     | 0.90  | 1.02 | 1.00     | 1.05 |
| <b>Care home resident</b>  | No                              | 1.00  | Baseline |       | 1.00 | Baseline |      |
|                            | Yes                             | 0.97  | 0.88     | 1.06  | 0.76 | 0.61     | 0.95 |
| <b>Recent travel</b>       | No                              | 1.00  | Baseline |       | 1.00 | Baseline |      |
|                            | Yes                             | 1.06  | 1.03     | 1.08  | 0.82 | 0.79     | 0.85 |
| <b>Test date</b>           | 27-Nov-21                       | 1.00  | Baseline |       | 1.00 | Baseline |      |
|                            | 28-Nov-21                       | 0.73  | 0.36     | 1.50  | 1.04 | 1.00     | 1.09 |
|                            | 29-Nov-21                       | 0.64  | 0.34     | 1.20  | 0.81 | 0.78     | 0.84 |
|                            | 30-Nov-21                       | 1.13  | 0.64     | 2.00  | 0.67 | 0.64     | 0.70 |
|                            | 01-Dec-21                       | 1.99  | 1.16     | 3.39  | 0.77 | 0.74     | 0.80 |
|                            | 02-Dec-21                       | 2.64  | 1.55     | 4.49  | 0.77 | 0.74     | 0.81 |
|                            | 03-Dec-21                       | 4.02  | 2.38     | 6.77  | 0.83 | 0.80     | 0.87 |
|                            | 04-Dec-21                       | 7.22  | 4.31     | 12.09 | 0.89 | 0.85     | 0.93 |
|                            | 05-Dec-21                       | 12.04 | 7.26     | 19.96 | 0.85 | 0.81     | 0.89 |

|                                        |                                                 |         |         |                                 |      |      |
|----------------------------------------|-------------------------------------------------|---------|---------|---------------------------------|------|------|
| 06-Dec-21                              | 13.78                                           | 8.38    | 22.66   | 0.62                            | 0.60 | 0.65 |
| 07-Dec-21                              | 31.08                                           | 18.97   | 50.92   | 0.66                            | 0.64 | 0.69 |
| 08-Dec-21                              | 48.04                                           | 29.36   | 78.60   | 0.70                            | 0.67 | 0.73 |
| 09-Dec-21                              | 66.78                                           | 40.83   | 109.22  | 0.76                            | 0.73 | 0.79 |
| 10-Dec-21                              | 105.31                                          | 64.41   | 172.18  | 0.92                            | 0.88 | 0.96 |
| 11-Dec-21                              | 123.17                                          | 75.32   | 201.42  | 0.83                            | 0.80 | 0.87 |
| 12-Dec-21                              | 185.72                                          | 113.61  | 303.59  | 0.80                            | 0.77 | 0.84 |
| 13-Dec-21                              | 186.28                                          | 114.02  | 304.35  | 0.50                            | 0.48 | 0.52 |
| 14-Dec-21                              | 283.74                                          | 173.69  | 463.50  | 0.45                            | 0.43 | 0.47 |
| 15-Dec-21                              | 370.97                                          | 227.12  | 605.94  | 0.44                            | 0.42 | 0.45 |
| 16-Dec-21                              | 351.38                                          | 215.13  | 573.94  | 0.41                            | 0.40 | 0.43 |
| 17-Dec-21                              | 334.05                                          | 204.51  | 545.66  | 0.37                            | 0.35 | 0.38 |
| 18-Dec-21                              | 441.07                                          | 270.01  | 720.48  | 0.34                            | 0.33 | 0.36 |
| 19-Dec-21                              | 516.74                                          | 316.33  | 844.11  | 0.33                            | 0.31 | 0.35 |
| 20-Dec-21                              | 487.68                                          | 298.59  | 796.53  | 0.27                            | 0.25 | 0.28 |
| 21-Dec-21                              | 575.94                                          | 352.63  | 940.66  | 0.24                            | 0.23 | 0.25 |
| 22-Dec-21                              | 725.04                                          | 443.93  | 1184.18 | 0.23                            | 0.22 | 0.24 |
| 23-Dec-21                              | 692.73                                          | 424.13  | 1131.44 | 0.20                            | 0.19 | 0.21 |
| 24-Dec-21                              | 1219.66                                         | 746.69  | 1992.19 | 0.32                            | 0.30 | 0.33 |
| 25-Dec-21                              | 2797.41                                         | 1711.55 | 4572.17 | 0.51                            | 0.46 | 0.55 |
| 26-Dec-21                              | 1800.68                                         | 1102.26 | 2941.64 | 0.30                            | 0.28 | 0.32 |
| 27-Dec-21                              | 1193.37                                         | 730.62  | 1949.22 | 0.21                            | 0.20 | 0.22 |
| 28-Dec-21                              | 1035.21                                         | 633.80  | 1690.86 | 0.13                            | 0.13 | 0.14 |
| 29-Dec-21                              | 1271.99                                         | 778.83  | 2077.43 | 0.18                            | 0.17 | 0.19 |
| 30-Dec-21                              | 1483.55                                         | 908.35  | 2423.01 | 0.14                            | 0.13 | 0.15 |
| 31-Dec-21                              | 1479.17                                         | 905.59  | 2416.02 | 0.12                            | 0.11 | 0.13 |
| 01-Jan-22                              | 1547.61                                         | 947.34  | 2528.23 | 0.13                            | 0.11 | 0.14 |
| 02-Jan-22                              | 1372.85                                         | 840.52  | 2242.31 | 0.11                            | 0.10 | 0.12 |
| 03-Jan-22                              | 1408.09                                         | 862.15  | 2299.74 | 0.09                            | 0.09 | 0.10 |
| 04-Jan-22                              | 1167.32                                         | 714.76  | 1906.42 | 0.07                            | 0.07 | 0.08 |
| 05-Jan-22                              | 1134.84                                         | 694.85  | 1853.45 | 0.06                            | 0.06 | 0.07 |
| 06-Jan-22                              | 1014.64                                         | 621.24  | 1657.16 | 0.05                            | 0.05 | 0.05 |
| 07-Jan-22                              | 1012.14                                         | 619.64  | 1653.25 | 0.05                            | 0.04 | 0.06 |
| 08-Jan-22                              | 1009.61                                         | 617.98  | 1649.42 | 0.05                            | 0.04 | 0.06 |
| 09-Jan-22                              | 1208.09                                         | 739.41  | 1973.86 | 0.05                            | 0.04 | 0.06 |
| 10-Jan-22                              | 1113.06                                         | 681.42  | 1818.13 | 0.00                            | 0.00 | 0.01 |
| 11-Jan-22                              | 1056.63                                         | 646.81  | 1726.11 | 0.00                            | 0.00 | 0.00 |
| 12-Jan-22                              | 890.44                                          | 545.02  | 1454.78 | 0.00                            | 0.00 | 0.01 |
| <b>Hosmer-Lemeshow goodness of fit</b> | Decile of predicted probability of being a case |         |         | Observed/Expected cases (ratio) |      |      |
| 1                                      | 647/761 (0.85)                                  |         |         | 292/203 (1.44)                  |      |      |
| 2                                      | 14092/15306 (0.92)                              |         |         | 992/940 (1.06)                  |      |      |
| 3                                      | 44574/45327 (0.98)                              |         |         | 2078/2098 (0.99)                |      |      |
| 4                                      | 67420/67468 (1)                                 |         |         | 3719/3990 (0.93)                |      |      |
| 5                                      | 85441/83947 (1.02)                              |         |         | 6848/6993 (0.98)                |      |      |
| 6                                      | 100073/98100 (1.02)                             |         |         | 11053/11598 (0.95)              |      |      |

|    |                      |                    |
|----|----------------------|--------------------|
| 7  | 114430/112772 (1.01) | 19420/19522 (0.99) |
| 8  | 130280/130014 (1)    | 32821/31996 (1.03) |
| 9  | 149325/149959 (1)    | 51518/50275 (1.02) |
| 10 | 175558/178185 (0.99) | 74504/75631 (0.99) |

\*to ensure reasonable precision estimates are given if there are at least 10 cases or 2000 controls.

\*\*no cases



## Supplementary Figures

### Supplementary Figure 1. Flow chart demonstrating test selection and methodology.

Data on all positive PCR and LFT tests (Pillar 1 and Pillar 2), and on negative Pillar 2 PCR tests from symptomatic individuals with an onset date after 25 November 2020 were extracted up to 12 January 2022.

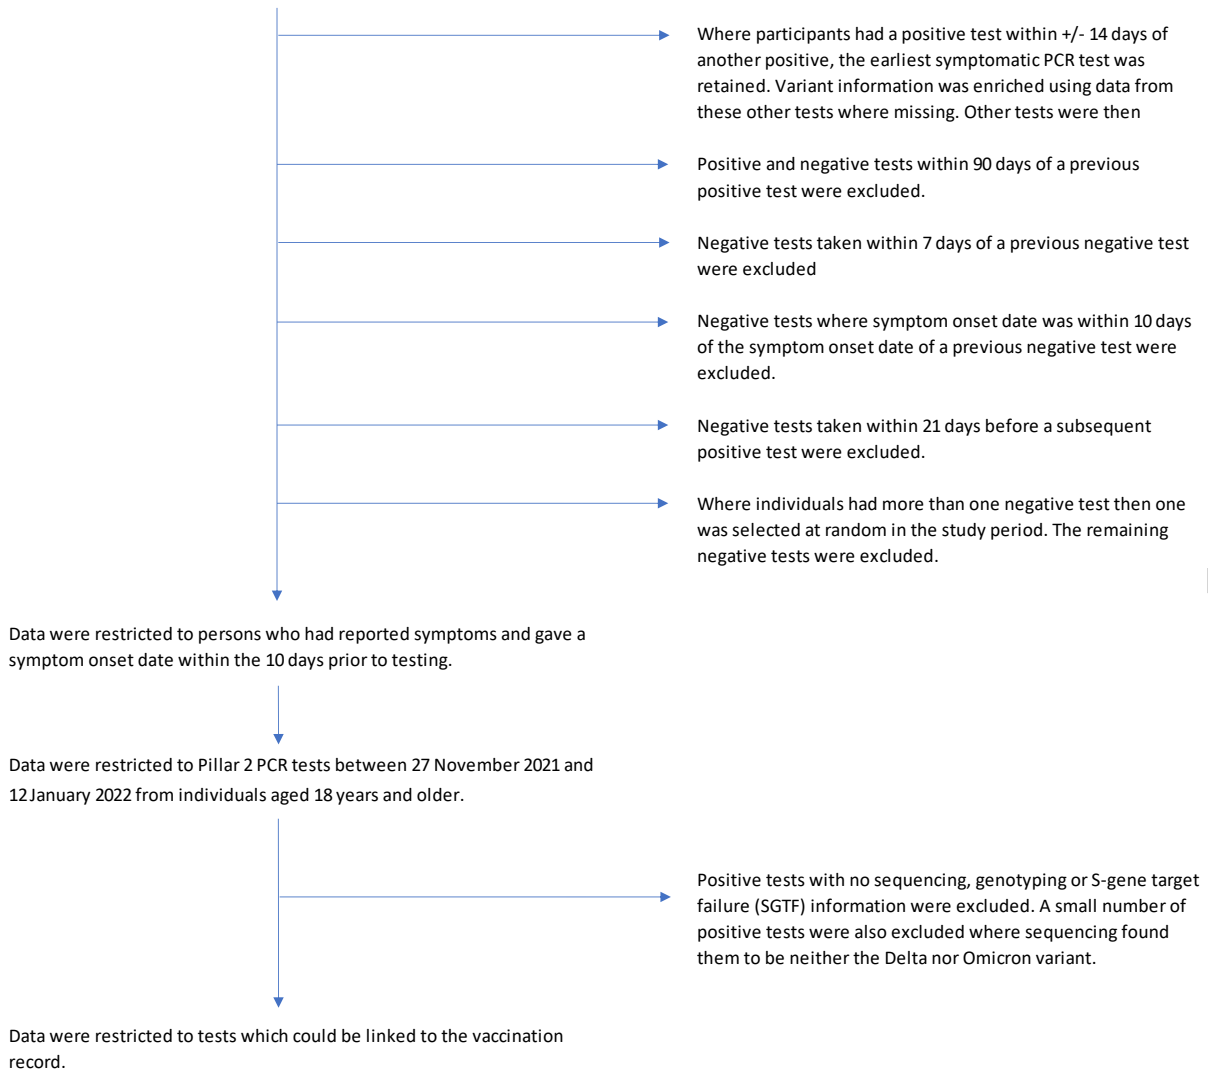

**Supplementary Figure 2. Distribution of Delta and Omicron cases in the study period.**

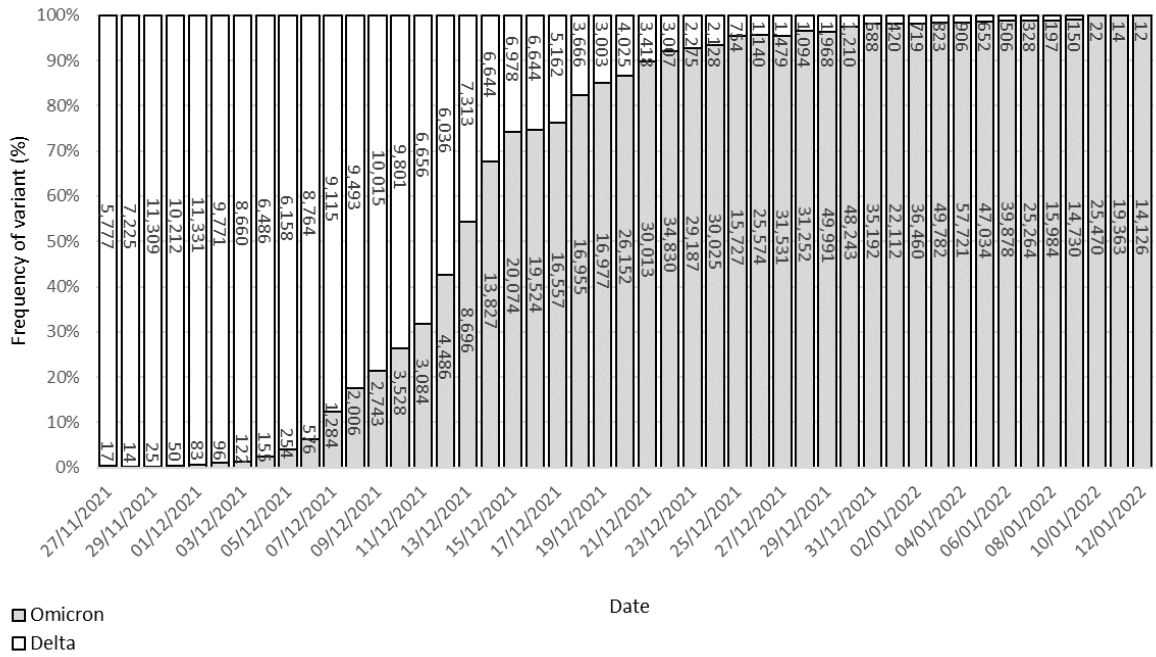

Supplement: NEJMoa2119451_appendix.pdf [file NEJMoa2119451_appendix.pdf]
