# Supplementary material
Source: PubMed Central journal article supplement (PMC8908811)

**Disclosure Purpose:** 21-19451

**Summary of Interests**

I do not have any interests to disclose at this time.

**Additional Questions:**

- 1. **Are there other relationships or activities that readers could perceive to have influenced, or that give the appearance of potentially influencing, what you wrote in the submitted work?**  
No.
- 2. **What is the manuscript title?**  
Effectiveness of COVID-19 Vaccines against the Omicron (B.1.1.529) Variant of Concern
- 3. **Are you the corresponding author?**  
No.

**Certification**

I certify that the information provided in this disclosure is complete and accurate.

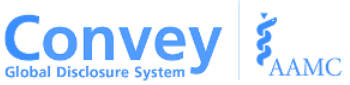

**Disclosure Purpose:** 21-19451

### Summary of Interests

I do not have any interests to disclose at this time.

### Additional Questions:

- Are there other relationships or activities that readers could perceive to have influenced, or that give the appearance of potentially influencing, what you wrote in the submitted work?**  
No.
- What is the manuscript title?**  
Duration of Protection of COVID-19 Vaccines Against Mild and Severe Disease.
- Are you the corresponding author?**  
No.

### Certification

I certify that the information provided in this disclosure is complete and accurate.

**Disclosure Purpose:** 21-19451

### Summary of Interests

I do not have any interests to disclose at this time.

### Additional Questions:

- Are there other relationships or activities that readers could perceive to have influenced, or that give the appearance of potentially influencing, what you wrote in the submitted work?**  
No.
- What is the manuscript title?**  
Duration of Protection of COVID-19 Vaccines Against Mild and Severe Disease
- Are you the corresponding author?**  
No.

### Certification

I certify that the information provided in this disclosure is complete and accurate.

**Disclosure Purpose:** 21-19451

**Summary of Interests**

I do not have any interests to disclose at this time.

**Additional Questions:**

- 1. **Are there other relationships or activities that readers could perceive to have influenced, or that give the appearance of potentially influencing, what you wrote in the submitted work?**  
No.
- 2. **What is the manuscript title?**  
Effectiveness of COVID-19 Vaccines against the Omicron (B.1.1.529) Variant of Concern
- 3. **Are you the corresponding author?**  
No.

**Certification**

I certify that the information provided in this disclosure is complete and accurate.

Disclosure Purpose: 21-19451

Summary of Interests

I do not have any interests to disclose at this time.

Additional Questions:

- 1. **Are there other relationships or activities that readers could perceive to have influenced, or that give the appearance of potentially influencing, what you wrote in the submitted work?**  
No.
- 2. **What is the manuscript title?**  
Effectiveness of COVID-19 Vaccines against the Omicron (B.1.1.529) Variant of Concern
- 3. **Are you the corresponding author?**  
No.

Certification

I certify that the information provided in this disclosure is complete and accurate.



Disclosure Purpose: 21-19451

Summary of Interests

I do not have any interests to disclose at this time.

Additional Questions:

- 1. **Are there other relationships or activities that readers could perceive to have influenced, or that give the appearance of potentially influencing, what you wrote in the submitted work?**  
No.
- 2. **What is the manuscript title?**  
Duration of Protection of COVID-19 Vaccines Against Mild and Severe Disease
- 3. **Are you the corresponding author?**  
No.

Certification

I certify that the information provided in this disclosure is complete and accurate.

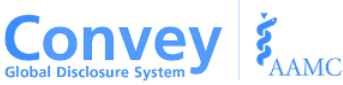

**Disclosure Purpose:** 21-19451

### Summary of Interests

I do not have any interests to disclose at this time.

### Additional Questions:

- Are there other relationships or activities that readers could perceive to have influenced, or that give the appearance of potentially influencing, what you wrote in the submitted work?**  
No.
- What is the manuscript title?**  
Duration of Protection of COVID-19 Vaccines Against Mild and Severe Disease
- Are you the corresponding author?**  
No.

### Certification

I certify that the information provided in this disclosure is complete and accurate.

**Disclosure Purpose:** 21-19451

**Summary of Interests**

I do not have any interests to disclose at this time.

**Additional Questions:**

- 1. **Are there other relationships or activities that readers could perceive to have influenced, or that give the appearance of potentially influencing, what you wrote in the submitted work?**  
No.
- 2. **What is the manuscript title?**  
Durability of Protection Against Future SARS-CoV-2 Infection Following Vaccination and Prior Infection in UK Healthcare Workers (the SIREN Cohort)
- 3. **Are you the corresponding author?**  
No.

**Certification**

I certify that the information provided in this disclosure is complete and accurate.





Disclosure Purpose: 21-19451

## Summary of Interests

## Company or Organization

| Entity                                                                                                                                                                                                                                                                                                                                                                                                                                                                                                                     | Type             | Interest Held By                                                                |
|----------------------------------------------------------------------------------------------------------------------------------------------------------------------------------------------------------------------------------------------------------------------------------------------------------------------------------------------------------------------------------------------------------------------------------------------------------------------------------------------------------------------------|------------------|---------------------------------------------------------------------------------|
| GlaxoSmithKline                                                                                                                                                                                                                                                                                                                                                                                                                                                                                                            | Grant / Contract | Other - employing organisation                                                  |
| <i>Recipient Name:</i> public health england<br><i>Grant / Contract Description:</i> Seasonal influenza - Zanamivir<br><i>Additional Information:</i> My employer's predecessor organisation Public Health England has received funding from GSK. for a research project related to analysis of observational data for seasonal influenza and antiviral treatment (zanamivir). This preceded and had no relation to COVID-19. However, i have had no personal role in this work or received any funding from this project. |                  | <i>Recipient Type:</i> Institution<br><i>Grant / Contract Purpose:</i> Research |

## Additional Questions:

- Are there other relationships or activities that readers could perceive to have influenced, or that give the appearance of potentially influencing, what you wrote in the submitted work?  
No.
- What is the manuscript title?  
Duration of Protection of COVID-19 Vaccines Against Mild and Severe Disease
- Are you the corresponding author?  
No.

## Certification

I certify that the information provided in this disclosure is complete and accurate.

**Disclosure Purpose:** 21-19451

**Summary of Interests**

I do not have any interests to disclose at this time.

**Additional Questions:**

- 1. **Are there other relationships or activities that readers could perceive to have influenced, or that give the appearance of potentially influencing, what you wrote in the submitted work?**  
No.
- 2. **What is the manuscript title?**  
Effectiveness of COVID-19 Vaccines against the Omicron (B.1.1.529) Variant of Concern
- 3. **Are you the corresponding author?**  
No.

**Certification**

I certify that the information provided in this disclosure is complete and accurate.



Disclosure Purpose: 21-19451

## Summary of Interests

## Company or Organization

| Entity                                                                                                                                                                                                                                                                                                              | Type             | Interest Held By |
|---------------------------------------------------------------------------------------------------------------------------------------------------------------------------------------------------------------------------------------------------------------------------------------------------------------------|------------------|------------------|
| <a href="#">Bill and Melinda Gates Foundation</a>                                                                                                                                                                                                                                                                   | Grant / Contract | Self             |
| <p><i>Recipient Name:</i> Imperial College London<br/> <i>Grant / Contract Description:</i> Grant to run the Vaccine Impact Modelling Consortium<br/> <i>Additional Information:</i> I am PI. This grant did not support the work on this paper.</p>                                                                |                  |                  |
| <a href="#">Community Jameel</a>                                                                                                                                                                                                                                                                                    | Grant / Contract | Self             |
| <p><i>Recipient Name:</i> Imperial College London<br/> <i>Grant / Contract Description:</i> Philanthropic donation to found the Jameel Institute at Imperial<br/> <i>Additional Information:</i> I am PI. See <a href="https://www.communityjameel.org/">https://www.communityjameel.org/</a> for info about CJ</p> |                  |                  |
| <a href="#">GAVI Alliance</a>                                                                                                                                                                                                                                                                                       | Grant / Contract | Self             |
| <p><i>Recipient Name:</i> Imperial College London<br/> <i>Grant / Contract Description:</i> Funding for the Vaccine Impact Modelling Consortium, run by Imperial College<br/> <i>Additional Information:</i> I am PI. This grant did not fund the work on this paper.</p>                                           |                  |                  |
| <a href="#">Janssen Biotech</a>                                                                                                                                                                                                                                                                                     | Grant / Contract | Self             |
| <p><i>Recipient Name:</i> Imperial College London<br/> <i>Grant / Contract Description:</i> Grant to model a candidate antiviral agent for dengue<br/> <i>Additional Information:</i> Co-I. Not related to COVID-19.</p>                                                                                            |                  |                  |
| <a href="#">Medical Research Council</a>                                                                                                                                                                                                                                                                            | Grant / Contract | Self             |
| <p><i>Recipient Name:</i> Imperial College London<br/> <i>Grant / Contract Description:</i> Project grant under UKRI COVID rapid response scheme<br/> <i>Additional Information:</i> I am co-I</p>                                                                                                                  |                  |                  |
| <a href="#">Medical Research Council</a>                                                                                                                                                                                                                                                                            | Grant / Contract | Self             |
| <p><i>Recipient Name:</i> Imperial College London<br/> <i>Grant / Contract Description:</i> Centre Grant for the MRC Centre for Global Infectious Disease Analysis<br/> <i>Additional Information:</i> I am PI</p>                                                                                                  |                  |                  |
| <a href="#">National Institute for Health Research</a>                                                                                                                                                                                                                                                              | Grant / Contract | Self             |
| <p><i>Recipient Name:</i> Imperial College London<br/> <i>Grant / Contract Description:</i> Unit funding for the Health Protection Research Unit for Modelling and Health Economics<br/> <i>Additional Information:</i> I am PI</p>                                                                                 |                  |                  |
| <a href="#">Wellcome Trust</a>                                                                                                                                                                                                                                                                                      | Other            | Self             |
| <p><i>Category:</i> Other<br/> <i>Description:</i> Panel member<br/> <i>Additional Information:</i> I have sat on a number of grant and advisory panels for the Wellcome trust. An honorarium and travel costs are usually paid.</p>                                                                                |                  |                  |
| <a href="#">World Health Organization</a>                                                                                                                                                                                                                                                                           | Other            | Self             |
| <p><i>Category:</i> Other<br/> <i>Description:</i> Advisor<br/> <i>Additional Information:</i> I advise the WHO in a number of roles. None are remunerated, though travel costs are sometimes paid (not since 2019)</p>                                                                                             |                  |                  |

## Additional Questions:

- Are there other relationships or activities that readers could perceive to have influenced, or that give the appearance of potentially influencing, what you wrote in the submitted work?  
No.
- What is the manuscript title?  
Effectiveness of COVID-19 Vaccines against the Omicron (B.1.1.529) Variant of Concern
- Are you the corresponding author?

No.

Certification

I certify that the information provided in this disclosure is complete and accurate.

**Disclosure Purpose:** 21-19451

**Summary of Interests**

I do not have any interests to disclose at this time.

**Additional Questions:**

- 1. **Are there other relationships or activities that readers could perceive to have influenced, or that give the appearance of potentially influencing, what you wrote in the submitted work?**  
No.
- 2. **What is the manuscript title?**  
Duration of Protection of COVID-19 Vaccines Against Mild and Severe Disease
- 3. **Are you the corresponding author?**  
No.

**Certification**

I certify that the information provided in this disclosure is complete and accurate.

**Disclosure Purpose:** 21-19451

**Summary of Interests**

I do not have any interests to disclose at this time.

**Additional Questions:**

- 1. **Are there other relationships or activities that readers could perceive to have influenced, or that give the appearance of potentially influencing, what you wrote in the submitted work?**  
No.
- 2. **What is the manuscript title?**  
COVID-19 Vaccine Effectiveness against the Omicron (B.1.1.529) Variant
- 3. **Are you the corresponding author?**  
No.

**Certification**

I certify that the information provided in this disclosure is complete and accurate.



**Disclosure Purpose:** 21-19451

**Summary of Interests**

I do not have any interests to disclose at this time.

**Additional Questions:**

- 1. **Are there other relationships or activities that readers could perceive to have influenced, or that give the appearance of potentially influencing, what you wrote in the submitted work?**  
No.
- 2. **What is the manuscript title?**  
Effectiveness of COVID-19 Vaccines Against Omicron variant
- 3. **Are you the corresponding author?**  
No.

**Certification**

I certify that the information provided in this disclosure is complete and accurate.



**Disclosure Purpose:** 21-19451

**Summary of Interests**

I do not have any interests to disclose at this time.

**Additional Questions:**

- 1. **Are there other relationships or activities that readers could perceive to have influenced, or that give the appearance of potentially influencing, what you wrote in the submitted work?**  
No.
- 2. **What is the manuscript title?**  
Duration of Protection of COVID-19 Vaccines Against Mild and Severe Disease
- 3. **Are you the corresponding author?**  
No.

**Certification**

I certify that the information provided in this disclosure is complete and accurate.





**Disclosure Purpose:** 21-19451

**Summary of Interests**

I do not have any interests to disclose at this time.

**Additional Questions:**

- 1. **Are there other relationships or activities that readers could perceive to have influenced, or that give the appearance of potentially influencing, what you wrote in the submitted work?**  
No.
- 2. **What is the manuscript title?**  
Effectiveness of COVID-19 Vaccines against the Omicron (B.1.1.529) Variant of Concern
- 3. **Are you the corresponding author?**  
No.

**Certification**

I certify that the information provided in this disclosure is complete and accurate.



Disclosure Purpose: 21-19451

Summary of Interests

**Company or Organization**

| Entity                                                        | Type       | Interest Held By                                                        |
|---------------------------------------------------------------|------------|-------------------------------------------------------------------------|
| Gilead Sciences                                               | Consultant | Self                                                                    |
| <i>Category:</i> Consultant<br><i>Additional Information:</i> |            | <i>Description:</i> Development of slideset for HIV and quality of life |

Additional Questions:

- Are there other relationships or activities that readers could perceive to have influenced, or that give the appearance of potentially influencing, what you wrote in the submitted work?**  
No.
- What is the manuscript title?**  
Effectiveness of COVID-19 Vaccines against the Omicron (B.1.1.529) Variant of Concern
- Are you the corresponding author?**  
No.

Certification

I certify that the information provided in this disclosure is complete and accurate.

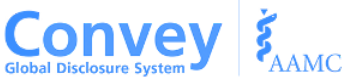

**Disclosure Purpose:** 21-19451

**Summary of Interests**

I do not have any interests to disclose at this time.

**Additional Questions:**

- Are there other relationships or activities that readers could perceive to have influenced, or that give the appearance of potentially influencing, what you wrote in the submitted work?**  
No.
- What is the manuscript title?**  
Effectiveness of COVID-19 Vaccines against the Omicron (B.1.1.529) Variant of Concern
- Are you the corresponding author?**  
No.

**Certification**

I certify that the information provided in this disclosure is complete and accurate.



**Disclosure Purpose:** 21-19451

**Summary of Interests**

I do not have any interests to disclose at this time.

**Additional Questions:**

- 1. **Are there other relationships or activities that readers could perceive to have influenced, or that give the appearance of potentially influencing, what you wrote in the submitted work?**  
No.
- 2. **What is the manuscript title?**  
Duration of protection of BNT162b2ChAdOx1-SmRNA-1273COVID-19 vaccines against mild and severe disease in England
- 3. **Are you the corresponding author?**  
No.

**Certification**

I certify that the information provided in this disclosure is complete and accurate.



**Disclosure Purpose:** 21-19451

## Summary of Interests

I do not have any interests to disclose at this time.

## Additional Questions:

1. **Are there other relationships or activities that readers could perceive to have influenced, or that give the appearance of potentially influencing, what you wrote in the submitted work?**

No.

2. **What is the manuscript title?**

COVID-19 vaccine effectiveness against the Omicron (B. 1.1.529) variant

3. **Are you the corresponding author?**

Yes.

a. **Please list the other authors' names here.**

Nick Andrews PhD1,2,\* Julia Stowe PhD1,\* Freja Kirsebom PhD1, Samuel Toffa PhD1, Tim Rickeard1, Eileen Gallagher PhD1, Charlotte Gower DPhil1, Meaghan Kall1, Natalie Groves MSc1, Anne-Marie O'Connell1, David Simons1, Paula B. Blomquist1, Asad Zaidi1, Sophie Nash1, Nurin Iwani Binti Abdul Aziz1, Simon Thelwall1, Gavin Dabrera MBBS, FFPH1, Richard Myers1, MRCPCH1,3, Gayatri Amirthalingam MFPH1,2, Saheer Gharbia1, Jeffrey C. Barrett D Phil4, Richard Elson1, Shamez N Ladhani PhD, MRCPCH1,3, Neil Ferguson5,6, Maria Zambon PhD, FRCPath1,6, Colin NJ Campbell MPH, FFPH1,2, Kevin Brown MRCP FRCPath1,2, Susan Hopkins FRCP, FFPH1,7, Meera Chand MRCP, FRCPath1,8, Mary Ramsay MBBS, FFPH1,2, Jamie Lopez Bernal PhD ,MBBS 1,2,6

## Certification

I certify that the information provided in this disclosure is complete and accurate.

**Disclosure Purpose:** 21-19451

Summary of Interests

I do not have any interests to disclose at this time.

Additional Questions:

- 1. **Are there other relationships or activities that readers could perceive to have influenced, or that give the appearance of potentially influencing, what you wrote in the submitted work?**  
No.
- 2. **What is the manuscript title?**  
Effectiveness of COVID-19 Vaccines against the Omicron (B.1.1.529) Variant of Concern
- 3. **Are you the corresponding author?**  
No.

Certification

I certify that the information provided in this disclosure is complete and accurate.



**Disclosure Purpose:** 21-19451

**Summary of Interests**

I do not have any interests to disclose at this time.

**Additional Questions:**

- 1. **Are there other relationships or activities that readers could perceive to have influenced, or that give the appearance of potentially influencing, what you wrote in the submitted work?**  
No.
- 2. **What is the manuscript title?**  
Effectiveness of COVID-19 Vaccines against the Omicron (B.1.1.529) Variant of Concern
- 3. **Are you the corresponding author?**  
No.

**Certification**

I certify that the information provided in this disclosure is complete and accurate.



**Disclosure Purpose:** 21-19451

### Summary of Interests

I do not have any interests to disclose at this time.

### Additional Questions:

- Are there other relationships or activities that readers could perceive to have influenced, or that give the appearance of potentially influencing, what you wrote in the submitted work?**  
No.
- What is the manuscript title?**  
Effectiveness of COVID-19 Vaccines against the Omicron (B.1.1.529) Variant of Concern
- Are you the corresponding author?**  
No.

### Certification

I certify that the information provided in this disclosure is complete and accurate.



Disclosure Purpose: 21-19451

## Summary of Interests

## Company or Organization

| Entity                                                                                                                                                               | Type             | Interest Held By                                                                                                                                                                                                                                                                                                                                                                                                                                                                                |
|----------------------------------------------------------------------------------------------------------------------------------------------------------------------|------------------|-------------------------------------------------------------------------------------------------------------------------------------------------------------------------------------------------------------------------------------------------------------------------------------------------------------------------------------------------------------------------------------------------------------------------------------------------------------------------------------------------|
| Pfizer                                                                                                                                                               | Grant / Contract | Other - Department                                                                                                                                                                                                                                                                                                                                                                                                                                                                              |
| <b>Recipient Name:</b> Public Health England<br><b>Grant / Contract Description:</b> Post-marketing surveillance reports on pneumococcal and meningococcal infection |                  | <b>Recipient Type:</b> Institution<br><b>Grant / Contract Purpose:</b> Other - Risk Management Strategy<br><b>Additional Information:</b> The Immunisation Department has provided vaccine manufacturers (including Pfizer) with post-marketing surveillance reports on pneumococcal and meningococcal infection which the companies are required to submit to the UK Licensing authority in compliance with their Risk Management Strategy. A cost recovery charge is made for these reports.. |

## Additional Questions:

- Are there other relationships or activities that readers could perceive to have influenced, or that give the appearance of potentially influencing, what you wrote in the submitted work?  
No.
- What is the manuscript title?  
Effectiveness of COVID-19 Vaccines against the Omicron (B.1.1.529) Variant of Concern
- Are you the corresponding author?  
No.

## Certification

I certify that the information provided in this disclosure is complete and accurate.

**Disclosure Purpose:** 21-19451

**Summary of Interests**

I do not have any interests to disclose at this time.

**Additional Questions:**

- Are there other relationships or activities that readers could perceive to have influenced, or that give the appearance of potentially influencing, what you wrote in the submitted work?**  
No.
- What is the manuscript title?**  
Covid-19 Vaccine Effectiveness against 3 the Omicron (B.1.1.529) Variant
- Are you the corresponding author?**  
No.

**Certification**

I certify that the information provided in this disclosure is complete and accurate.



Disclosure Purpose: 21-19451

Summary of Interests

**Company or Organization**

| Entity                                                                                                                                                                     | Type             | Interest Held By                                                               |
|----------------------------------------------------------------------------------------------------------------------------------------------------------------------------|------------------|--------------------------------------------------------------------------------|
| Biotechnology and Biological Sciences Research Council                                                                                                                     | Grant / Contract | Self                                                                           |
| <i>Recipient Name:</i> David Simons<br><i>Grant / Contract Description:</i> PhD research funding and stipend<br><i>Additional Information:</i> [grant number BB/M009513/1] |                  | <i>Recipient Type:</i> Individual<br><i>Grant / Contract Purpose:</i> Research |

Additional Questions:

- Are there other relationships or activities that readers could perceive to have influenced, or that give the appearance of potentially influencing, what you wrote in the submitted work?**  
No.
- What is the manuscript title?**  
Effectiveness of COVID-19 Vaccines against the Omicron (B.1.1.529) Variant of Concern
- Are you the corresponding author?**  
No.

Certification

I certify that the information provided in this disclosure is complete and accurate.

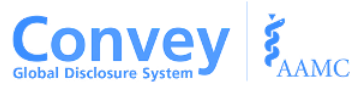

**Disclosure Purpose:** 21-19451

**Summary of Interests**

I do not have any interests to disclose at this time.

**Additional Questions:**

- Are there other relationships or activities that readers could perceive to have influenced, or that give the appearance of potentially influencing, what you wrote in the submitted work?**  
No.
- What is the manuscript title?**  
Effectiveness of COVID-19 Vaccines against the Omicron (B.1.1.529) Variant of Concern
- Are you the corresponding author?**  
No.

**Certification**

I certify that the information provided in this disclosure is complete and accurate.



**Disclosure Purpose:** 21-19451

### Summary of Interests

I do not have any interests to disclose at this time.

### Additional Questions:

- Are there other relationships or activities that readers could perceive to have influenced, or that give the appearance of potentially influencing, what you wrote in the submitted work?**  
No.
- What is the manuscript title?**  
Duration of Protection of COVID-19 Vaccines Against Mild and Severe Disease
- Are you the corresponding author?**  
No.

### Certification

I certify that the information provided in this disclosure is complete and accurate.

**Disclosure Purpose:** 21-19451

**Summary of Interests**

I do not have any interests to disclose at this time.

**Additional Questions:**

- 1. **Are there other relationships or activities that readers could perceive to have influenced, or that give the appearance of potentially influencing, what you wrote in the submitted work?**  
No.
- 2. **What is the manuscript title?**  
Effectiveness of COVID-19 Vaccines against the Omicron (B.1.1.529) Variant of Concern
- 3. **Are you the corresponding author?**  
No.

**Certification**

I certify that the information provided in this disclosure is complete and accurate.



**Disclosure Purpose:** 21-19451

**Summary of Interests**

I do not have any interests to disclose at this time.

**Additional Questions:**

- 1. **Are there other relationships or activities that readers could perceive to have influenced, or that give the appearance of potentially influencing, what you wrote in the submitted work?**  
No.
- 2. **What is the manuscript title?**  
Effectiveness of COVID-19 Vaccines against the Omicron (B.1.1.529) Variant of Concern
- 3. **Are you the corresponding author?**  
No.

**Certification**

I certify that the information provided in this disclosure is complete and accurate.

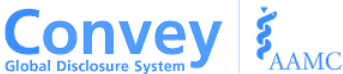

Disclosure Purpose: 21-19451

Summary of Interests

**Company or Organization**

| Entity                                                                                                                                             | Type              | Interest Held By                                           |
|----------------------------------------------------------------------------------------------------------------------------------------------------|-------------------|------------------------------------------------------------|
| International Society for Influenza and other Respiratory Virus Diseases (ISIRV)                                                                   | Fiduciary Officer | Self                                                       |
| <i>Official Title:</i> Chair of ISIRV                                                                                                              |                   | <i>Position Description:</i> Chair position on ISIRV board |
| <i>Additional Information:</i> Charitable organisation, registered charity in the UK. Unremunerated position. Member of the board since 2016/2017. |                   |                                                            |

Additional Questions:

- Are there other relationships or activities that readers could perceive to have influenced, or that give the appearance of potentially influencing, what you wrote in the submitted work?**  
No.
- What is the manuscript title?**  
Effectiveness of COVID-19 Vaccines against the Omicron (B.1.1.529) Variant of Concern
- Are you the corresponding author?**  
No.

Certification

I certify that the information provided in this disclosure is complete and accurate.

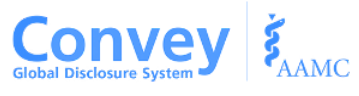

Supplement: NEJMoa2119451_disclosures.pdf [file NEJMoa2119451_disclosures.pdf]
